# Supplementary material for: Not all low fetal fraction cell‐free DNA screening failures are at increased risk for aneuploidy
Source: PubMed Central journal article supplement — Prenat Diagn. 2021 Mar 8;41(11):1372–9. doi: 10.1002/pd.5918 (PMC8596865; doi:10.1002/pd.5918), 2021-03-08
Supplement: PD-41-1372-s001.pdf [file PD-41-1372-s001.pdf]

**Supplemental Figure 1.** Conceptual diagram of how signal (i.e. FF) and noise can effect sample inclusion. SNR-dependent sensitivity level areas are marked by gray text.

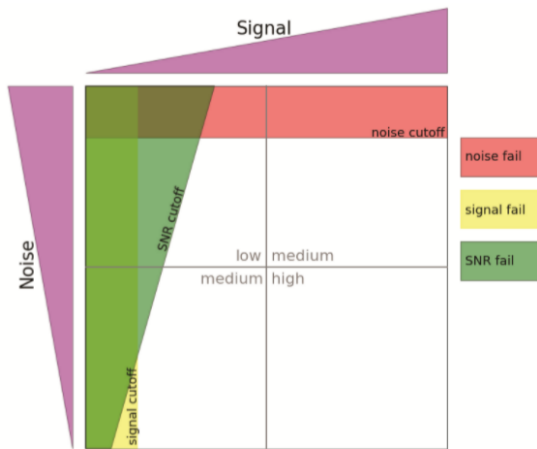

Figure from Mazloom, M. Sample specific fetal fraction threshold for non-invasive prenatal testing. Presented at the American College of Medical Genetics Annual Clinical Genetics Meeting. Phoenix, Mar 21-25, 2017
