# Supplementary figures and images for: Not all low fetal fraction cell‐free DNA screening failures are at increased risk for aneuploidy
Source: PubMed Central journal article supplement — Prenat Diagn. 2021 Mar 8;41(11):1372–9. doi: 10.1002/pd.5918 (PMC8596865; doi:10.1002/pd.5918), 2021-03-08

Supplemental Figure 2. SNR threshold determination based on cumulative sensitivity

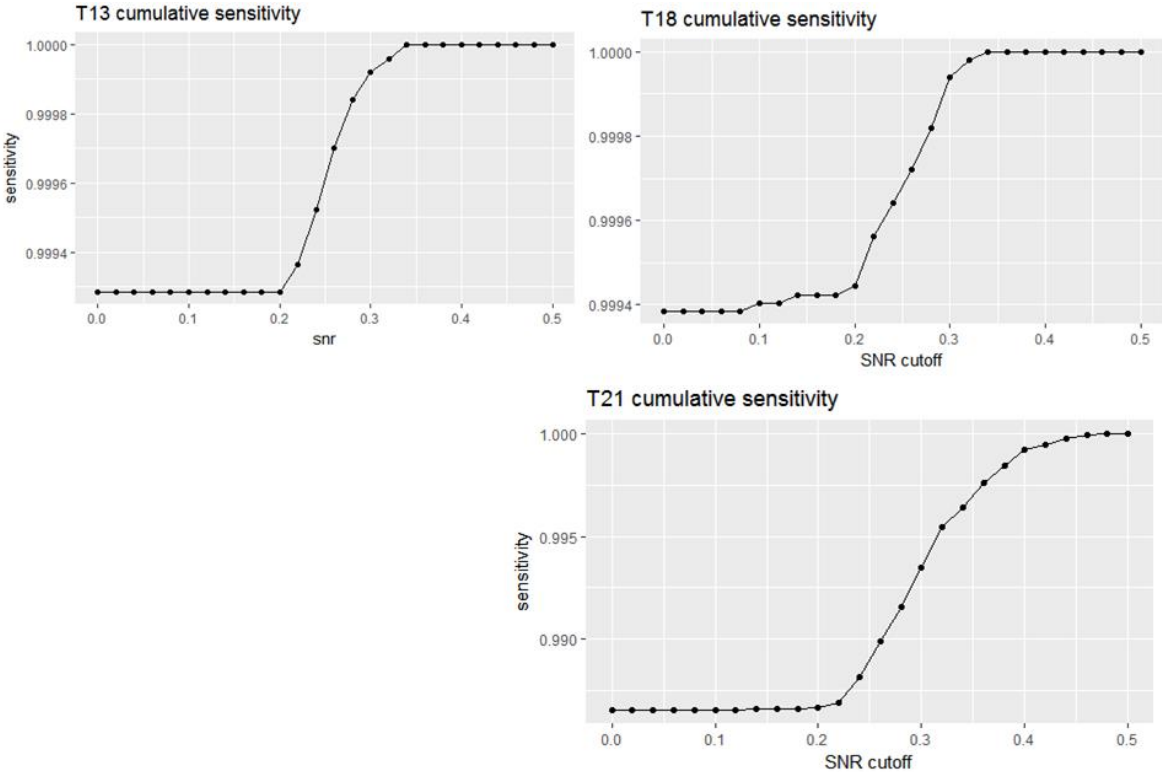

Supplement: PD-41-1372-s002.pdf [file PD-41-1372-s002.pdf]
